# Supplementary material
Source: PubMed Central journal article supplement (PMC4096230)

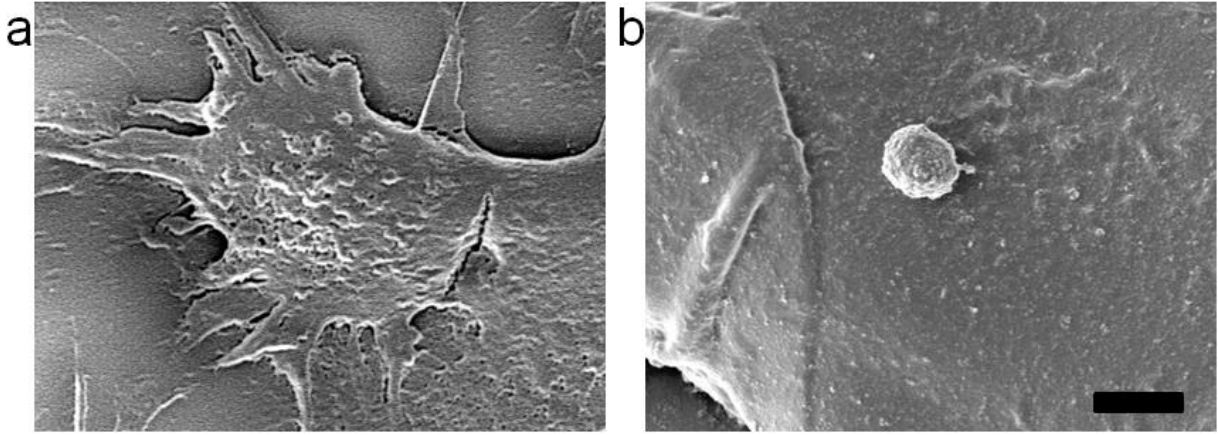

Supporting Information Figure 1. SEM images of (a) MMC cells and (b) p98 T cells. Scale bar = 5  $\mu\text{m}$ .

Supplement: mp5002119_si_001.pdf [file mp5002119_si_001.pdf]
